# Supplementary material
Source: Springer Nature journal article supplement (https://www.springerprofessional.de/resource/supplementary/13688_2018_145_MOESM1_ESM.pdf/15863704)

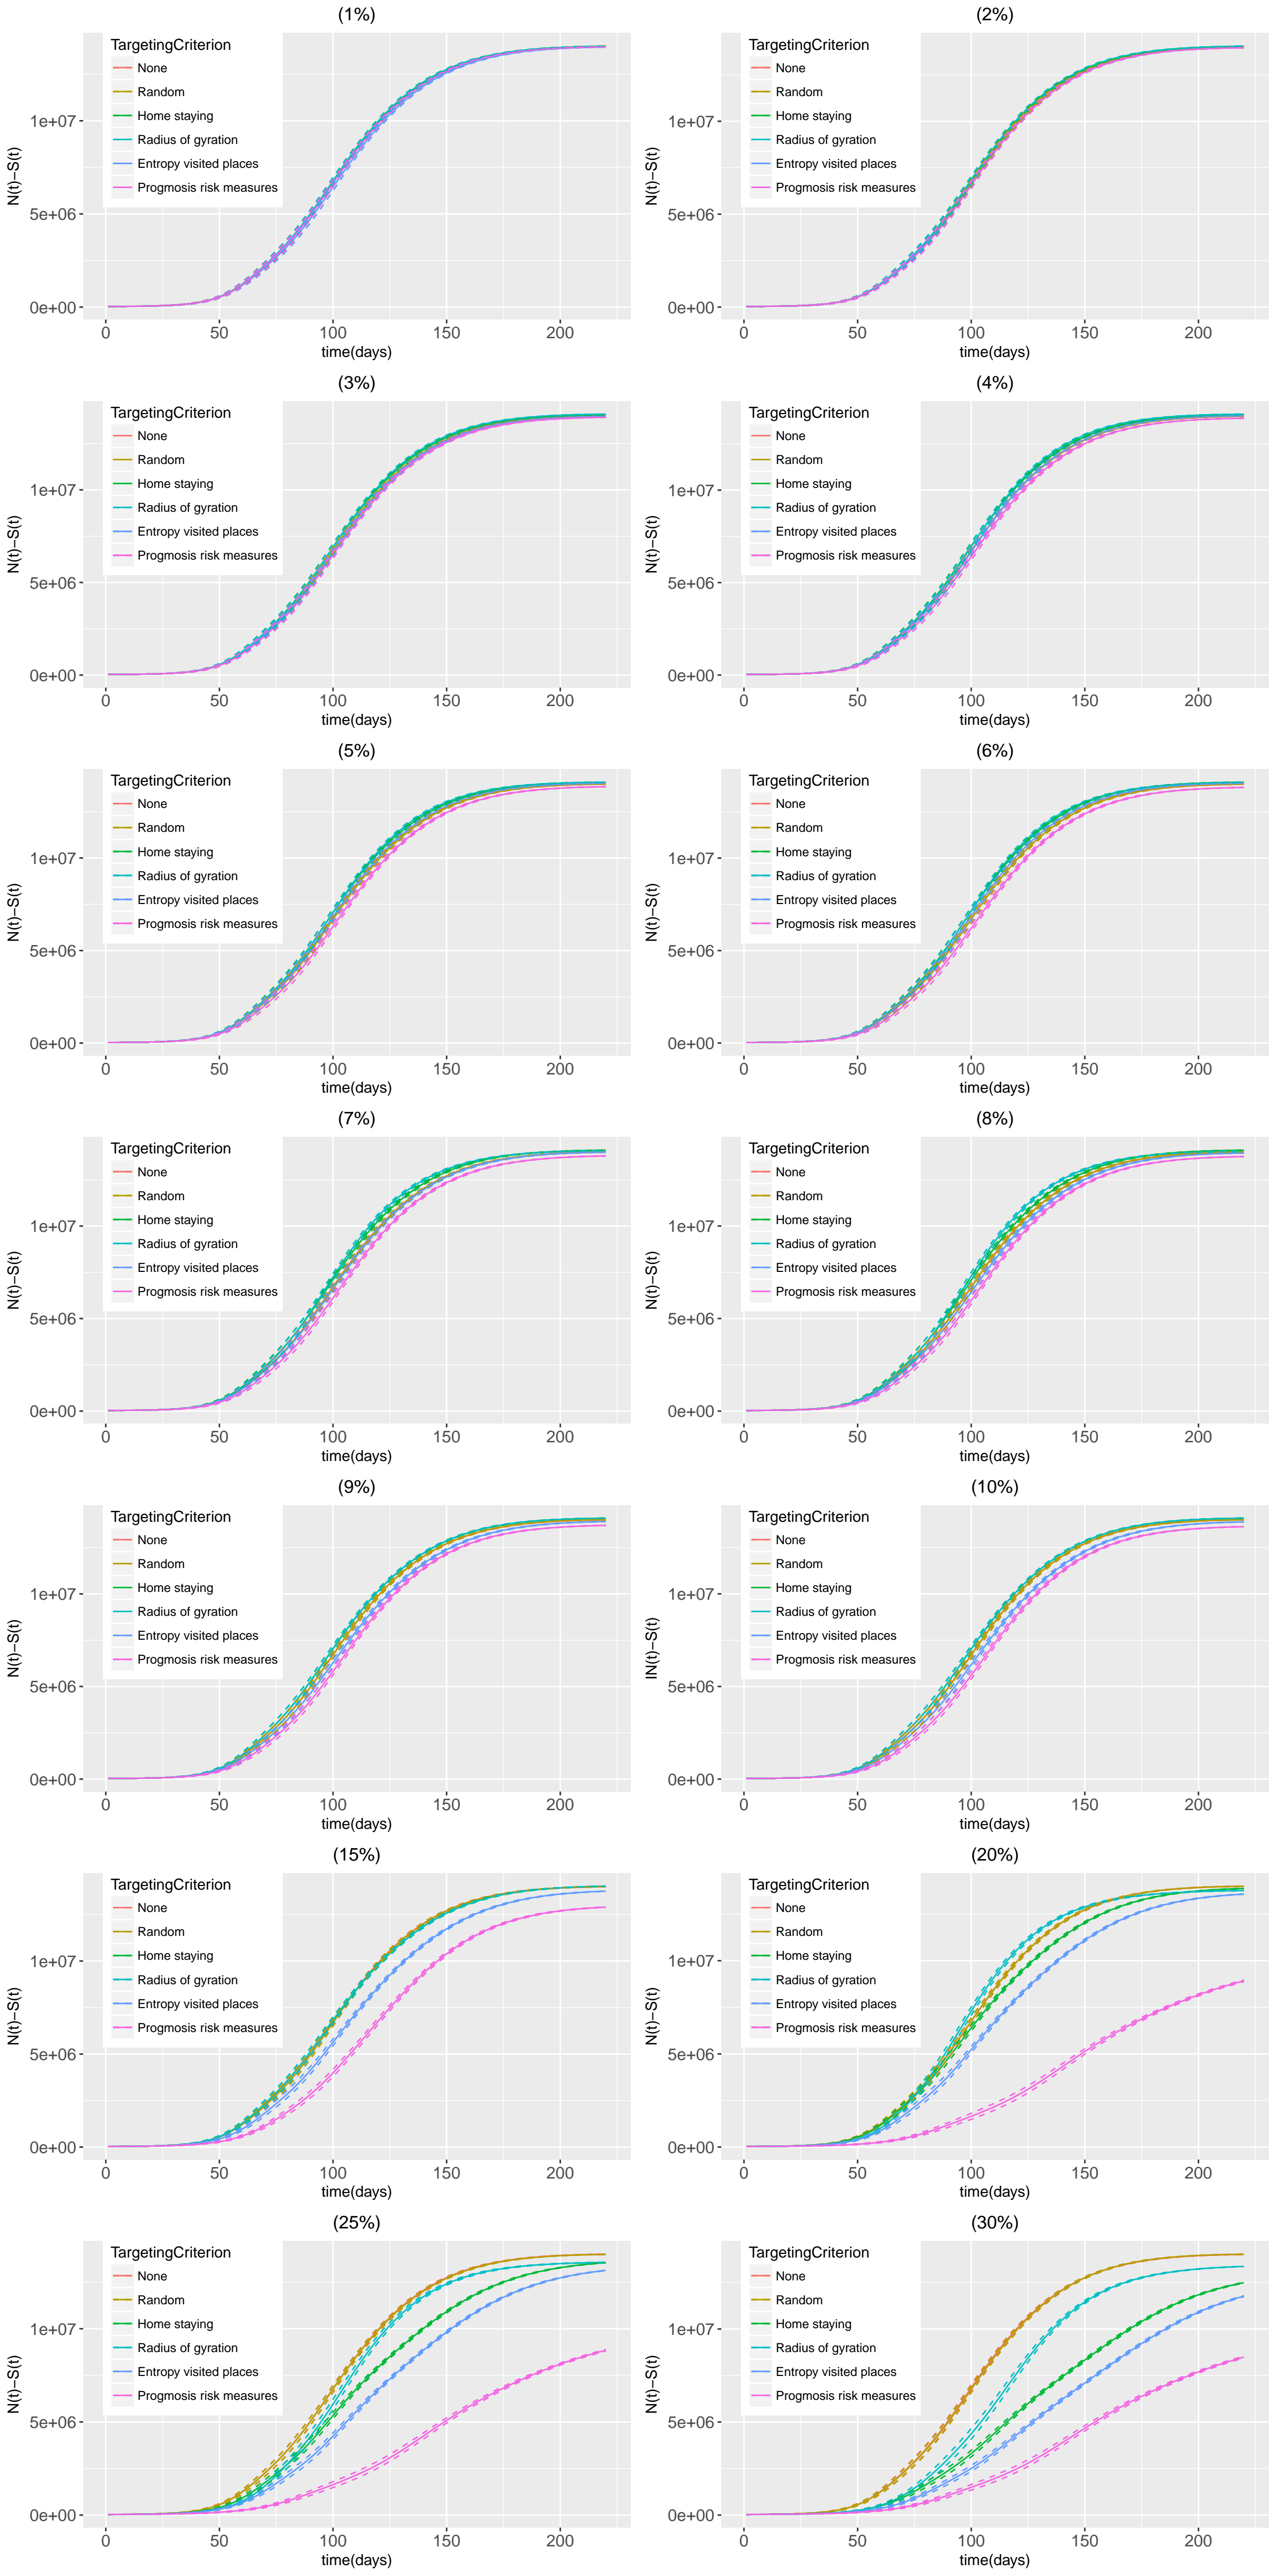

Supplement: MOESM1 [file 15863704]
